# Supplementary material for: Performance Evaluation of the Gradient Diffusion Strip Method and Disk Diffusion Method for Ceftazidime–Avibactam Against Enterobacterales and Pseudomonas aeruginosa: A Dual-Center Study
Source: Front Microbiol. 2021 Sep 16;12:710526. doi: 10.3389/fmicb.2021.710526 (PMC8481768; doi:10.3389/fmicb.2021.710526)
Supplement: Supplementary file 1 [file Table_1.XLSX]

## Sheet: Sheet1
No.	Gender	age	Organism	Specimen	genotype	Method
						BMD (mg/L)	susceptibility	Etest (mg/L)	susceptibility	Disc zone diameter (mm)	susceptibility
1001	male	74	Serratia marcescens	sputum		0.5	S	0.5	S	27	S
1002	female	76	Serratia marcescens	sputum		0.5	S	1	S	29	S
1003	female	83	Serratia marcescens	sputum	KPC	1	S	2	S	26	S
1004	male	69	Serratia marcescens	sputum		0.5	S	0.5	S	31	S
1005	male	57	Serratia marcescens	sputum		0.25	S	0.25	S	30	S
1006	female	61	Serratia marcescens	bile		0.5	S	0.25	S	30	S
1007	male	79	Klebsiella aerogenes	blood		0.125	S	0.25	S	30	S
1008	female	48	Klebsiella aerogenes	blood		0.5	S	1	S	25	S
1009	female	44	Klebsiella aerogenes	blood		0.125	S	0.25	S	28	S
1010	male	21	Morganella morganii	ascitic fluid		0.125	S	0.064	S	30	S
1011	female	75	Morganella morganii	ascitic fluid		0.064	S	0.125	S	34	S
1012	female	33	Citrobacter freundii	blood		0.25	S	0.25	S	30	S
1013	male	66	Citrobacter freundii	ascitic fluid		0.5	S	0.25	S	27	S
1014	male	77	Citrobacter freundii	blood		0.25	S	0.25	S	30	S
1015	male	61	Citrobacter koseri	sputum		0.25	S	0.5	S	28	S
1016	male	49	Citrobacter koseri	sputum		0.125	S	0.25	S	29	S
1017	female	38	Citrobacter koseri	vaginal swab		0.5	S	0.25	S	28	S
1018	male	69	Citrobacter koseri	sputum		0.125	S	0.125	S	31	S
1019	male	54	Klebsiella pneumoniae	sputum	KPC	2	S	4	S	24	S
1020	female	27	Klebsiella pneumoniae	urine	KPC	4	S	8	S	25	S
1021	male	16	Klebsiella pneumoniae	sputum	KPC	2	S	4	S	27	S
1022	male	90	Klebsiella pneumoniae	sputum	KPC	2	S	4	S	25	S
1023	male	80	Klebsiella pneumoniae	sputum	KPC	4	S	2	S	24	S
1024	male	83	Klebsiella pneumoniae	sputum	KPC	2	S	2	S	25	S
1025	female	85	Klebsiella pneumoniae	sputum	KPC	1	S	2	S	26	S
1026	male	88	Klebsiella pneumoniae	urine	KPC	4	S	4	S	23	S
1027	male	55	Klebsiella pneumoniae	bronchoalveolar lavage fluid	KPC	4	S	4	S	25	S
1028	female	87	Klebsiella pneumoniae	blood	KPC	4	S	8	S	23	S
1029	female	76	Klebsiella pneumoniae	secretion	KPC	2	S	4	S	25	S
1030	male	68	Klebsiella pneumoniae	blood	KPC	2	S	2	S	25	S
1031	male	61	Klebsiella pneumoniae	blood	KPC	2	S	2	S	25	S
1032	male	29	Klebsiella pneumoniae	blood	KPC	1	S	2	S	28	S
1033	female	36	Klebsiella oxytoca	ascitic fluid		0.25	S	0.25	S	28	S
1034	male	61	Klebsiella oxytoca	sputum		0.125	S	0.125	S	31	S
1035	female	72	Klebsiella oxytoca	sputum		0.125	S	0.125	S	31	S
1036	male	76	Klebsiella oxytoca	sputum	KPC	1	S	1	S	31	S
1037	female	70	Klebsiella oxytoca	sputum	IMP	512	R	512	R	19	R
1038	female	8	Escherichia coli	urine		0.125	S	0.25	S	42	S
1039	female	56	Escherichia coli	secretion	NDM	512	R	512	R	19	R
1040	male	65	Escherichia coli	drainage fluid	KPC	0.125	S	0.25	S	30	S
1041	female	49	Enterobacter cloacae	sputum		0.125	S	0.5	S	28	S
1042	female	72	Proteus vulgaris	drainage fluid		0.064	S	0.064	S	26	S
1043	male	45	Proteus vulgaris	skin swab		0.125	S	0.064	S	33	S
1044	female	54	Proteus mirabilis	sputum		0.064	S	0.064	S	36	S
1045	male	73	Proteus mirabilis	sputum		0.064	S	0.032	S	39	S
1046	male	85	Proteus mirabilis	sputum		0.125	S	0.064	S	33	S
1047	female	96	Proteus mirabilis	urine		0.125	S	0.064	S	35	S
1048	female	20	Proteus mirabilis	urine		0.125	S	0.064	S	34	S
1049	female	19	Proteus mirabilis	urine		0.064	S	0.064	S	33	S
1050	male	63	Proteus mirabilis	ascitic fluid		0.032	S	0.032	S	34	S
1051	male	88	Proteus mirabilis	sputum		0.125	S	0.125	S	34	S
1052	male	57	Proteus mirabilis	sputum		0.032	S	0.064	S	36	S
1053	female	54	Providencia stuartii	skin swab		0.125	S	0.25	S	32	S
1054	female	77	Providencia rettgeri	drainage fluid		0.064	S	0.032	S	35	S
1055	female	51	Providencia rettgeri	drainage fluid		0.125	S	0.064	S	34	S
1056	male	43	Providencia rettgeri	urine		0.25	S	0.25	S	35	S
1057	male	71	Providencia rettgeri	urine		0.064	S	0.064	S	33	S
1058	male	51	Proteus vulgaris	skin swab		0.125	S	0.125	S	31	S
1059	female	6	Citrobacter freundii	urine	NDM	512	R	512	R	17	R
1060	female	71	Citrobacter freundii	drainage fluid		0.25	S	0.5	S	27	S
1061	male	68	Citrobacter freundii	blood		8	S	8	S	23	S
1062	female	47	Enterobacter cloacae	bile	IMP	512	R	512	R	14	R
1063	female	105	Enterobacter cloacae	gastric juice		4	S	4	S	27	S
1064	male	40	Enterobacter cloacae	pus	NDM	512	R	512	R	10	R
1065	female	37	Enterobacter cloacae	sputum	NDM	512	R	512	R	14	R
1066	female	60	Escherichia coli	urine	NDM	512	R	512	R	20	R
1067	female	70	Escherichia coli	urine	NDM	512	R	512	R	20	R
1068	female	34	Escherichia coli	urine	NDM	512	R	512	R	20	R
1069	female	61	Escherichia coli	urine	NDM	512	R	512	R	19	R
1070	male	82	Escherichia coli	bile		0.5	S	1	S	30	S
1071	female	68	Escherichia coli	blood	NDM	512	R	512	R	19	R
1072	male	7	Escherichia coli	blood		0.125	S	0.125	S	32	S
1073	female	73	Escherichia coli	drainage fluid	KPC	1	S	2	S	28	S
1074	female	58	Klebsiella oxytoca	sputum		2	S	2	S	25	S
1075	male	49	Klebsiella oxytoca	sputum	KPC NDM	512	R	512	R	19	R
1076	male	42	Proteus mirabilis	sputum	not detected	512	R	512	R	13	R
1077	female	64	Proteus mirabilis	urine		2	S	2	S	24	S
1078	female	94	Proteus mirabilis	sputum		0.125	S	0.125	S	31	S
1079	male	47	Serratia marcescens	sputum	KPC	2	S	2	S	27	S
1080	male	33	Klebsiella pneumoniae	sputum	NDM	512	R	512	R	20	R
1081	female	51	Pseudomonas aeruginosa	sputum		8	S	8	S	25	S
1082	male	88	Pseudomonas aeruginosa	blood		8	S	8	S	24	S
1083	male	75	Pseudomonas aeruginosa	sputum	not detected	32	R	64	R	17	R
1084	male	34	Pseudomonas aeruginosa	blood	not detected	16	R	32	R	22	S
1085	male	55	Pseudomonas aeruginosa	sputum		8	S	4	S	23	S
1086	male	63	Pseudomonas aeruginosa	sputum	not detected	16	R	16	R	19	R
1087	male	58	Pseudomonas aeruginosa	sputum		4	S	4	S	24	S
1088	male	66	Pseudomonas aeruginosa	sputum		4	S	4	S	25	S
1089	male	67	Pseudomonas aeruginosa	sputum		8	S	4	S	23	S
1090	female	57	Pseudomonas aeruginosa	sputum		4	S	2	S	30	S
1091	female	14	Pseudomonas aeruginosa	sputum		2	S	2	S	28	S
1092	male	63	Pseudomonas aeruginosa	sputum	not detected	4	S	16	R	24	S
1093	male	68	Pseudomonas aeruginosa	sputum		4	S	2	S	28	S
1094	male	69	Pseudomonas aeruginosa	sputum	VIM	256	R	512	R	6	R
1095	male	66	Pseudomonas aeruginosa	sputum	VIM	256	R	512	R	6	R
1096	male	53	Pseudomonas aeruginosa	urine	not detected	128	R	256	R	17	R
1097	male	95	Escherichia coli	urine		0.125	S	0.25	S	31	S
1098	male	24	Morganella morganii	drainage fluid		0.5	S	0.25	S	29	S
1099	male	84	Klebsiella aerogenes	drainage fluid		0.25	S	0.25	S	29	S
1100	male	82	Escherichia coli	blood		0.125	S	0.25	S	32	S
1101	female	48	Escherichia coli	urine		0.064	S	0.125	S	31	S
1102	female	52	Escherichia coli	urine		0.125	S	0.25	S	32	S
1103	female	59	Escherichia coli	vaginal swab		0.064	S	0.064	S	37	S
1104	female	61	Escherichia coli	urine		0.125	S	0.25	S	33	S
1105	female	57	Pseudomonas aeruginosa	pleural fluid		2	S	2	S	28	S
1106	male	64	Citrobacter koseri	urine		0.125	S	0.125	S	32	S
1107	female	51	Escherichia coli	urine		0.064	S	0.125	S	32	S
1108	male	14	Serratia marcescens	urine		0.25	S	0.5	S	30	S
1109	female	78	Escherichia coli	urine		0.125	S	0.25	S	30	S
1110	female	14	Escherichia coli	urine		0.125	S	0.125	S	31	S
1111	female	58	Escherichia coli	urine	NDM	512	R	512	R	20	R
1112	female	60	Escherichia coli	urine		0.125	S	0.25	S	31	S
1113	female	88	Serratia marcescens	pleural fluid		0.125	S	0.25	S	30	S
1114	female	72	Proteus mirabilis	urine		0.032	S	0.064	S	33	S
1115	female	67	Klebsiella aerogenes	pus		0.5	S	0.5	S	26	S
1116	male	84	Serratia marcescens	sputum		4	S	4	S	25	S
1117	male	67	Klebsiella pneumoniae	bronchoalveolar lavage fluid		0.125	S	0.25	S	30	S
1118	male	54	Enterobacter cloacae	sputum	KPC	8	S	4	S	24	S
1119	male	65	Escherichia coli	sputum	NDM	512	R	512	R	15	R
1120	male	66	Escherichia coli	blood		0.064	S	0.125	S	32	S
1121	female	34	Escherichia coli	blood		0.25	S	0.5	S	27	S
1122	male	0	Escherichia coli	rectal swab	NDM	0.064	S	0.125	S	33	S
1123	female	89	Citrobacter koseri	urine		0.125	S	0.5	S	28	S
1124	male	49	Proteus mirabilis	ascitic fluid		0.032	S	0.064	S	34	S
1125	female	67	Proteus mirabilis	urine		0.032	S	0.064	S	34	S
1126	male	73	Pseudomonas aeruginosa	sputum		2	S	4	S	22	S
1127	male	78	Pseudomonas aeruginosa	sputum		8	S	8	S	24	S
1128	female	51	Klebsiella pneumoniae	blood		0.064	S	0.125	S	30	S
1129	male	72	Klebsiella pneumoniae	sputum		0.25	S	0.5	S	28	S
1130	female	49	Klebsiella pneumoniae	sputum	KPC	1	S	2	S	23	S
1131	male	63	Klebsiella pneumoniae	sputum	KPC	2	S	2	S	26	S
1132	male	55	Klebsiella pneumoniae	drainage fluid		0.125	S	0.25	S	30	S
1133	male	75	Klebsiella pneumoniae	drainage fluid	KPC	1	S	2	S	25	S
1134	male	82	Pseudomonas aeruginosa	sputum		4	S	2	S	25	S
1135	female	93	Pseudomonas aeruginosa	sputum		2	S	2	S	31	S
1136	female	0	Klebsiella aerogenes	rectal swab		0.25	S	0.25	S	28	S
1137	female	55	Klebsiella pneumoniae	sputum	KPC	1	S	2	S	25	S
1138	female	65	Klebsiella pneumoniae	tissue		1	S	0.5	S	26	S
1139	female	84	Klebsiella pneumoniae	urine	KPC	2	S	4	S	26	S
1140	male	76	Pseudomonas aeruginosa	sputum	not detected	16	R	16	R	20	R
1141	female	85	Pseudomonas aeruginosa	skin swab	not detected	16	R	32	R	19	R
1142	male	61	Pseudomonas aeruginosa	sputum		4	S	4	S	27	S
1143	female	49	Enterobacter cloacae	drainage fluid		0.25	S	0.5	S	30	S
1144	female	75	Pseudomonas aeruginosa	bronchoalveolar lavage fluid		2	S	2	S	27	S
1145	male	65	Pseudomonas aeruginosa	secretion		2	S	2	S	25	S
1146	male	60	Pseudomonas aeruginosa	bronchoalveolar lavage fluid		2	S	2	S	27	S
1147	male	74	Serratia marcescens	sputum		0.032	S	0.064	S	29	S
1148	male	0	Citrobacter freundii	rectal swab		0.25	S	0.5	S	27	S
1149	male	56	Pseudomonas aeruginosa	sputum	not detected	32	R	32	R	18	R
1150	female	59	Serratia marcescens	sputum	KPC	0.5	S	1	S	26	S
1151	male	73	Klebsiella oxytoca	sputum		0.125	S	0.25	S	28	S
1152	male	87	Enterobacter cloacae	sputum	NDM	512	R	512	R	20	R
1153	female	69	Proteus vulgaris	skin swab		0.064	S	0.064	S	33	S
1154	male	61	Citrobacter freundii	drainage fluid	not detected	256	R	512	R	13	R
1155	female	74	Enterobacter cloacae	secretion	KPC	0.5	S	1	S	24	S
1156	male	78	Klebsiella oxytoca	pleural fluid	IMP	512	R	512	R	18	R
1157	male	65	Enterobacter cloacae	skin swab	NDM	512	R	512	R	19	R
1158	female	61	Proteus mirabilis	secretion		0.032	S	0.064	S	34	S
1159	male	56	Enterobacter cloacae	skin swab	NDM	512	R	512	R	17	R
1160	male	78	Enterobacter cloacae	blood	NDM	512	R	512	R	19	R
1161	male	62	Enterobacter cloacae	secretion	NDM	512	R	512	R	17	R
1162	male	72	Klebsiella oxytoca	blood		0.125	S	0.125	S	33	S
1163	female	89	Citrobacter freundii	blood		0.25	S	0.5	S	29	S
1164	male	51	Pseudomonas aeruginosa	blood	not detected	16	R	16	R	21	S
1165	male	65	Citrobacter freundii	blood		0.5	S	1	S	27	S
1166	female	49	Klebsiella pneumoniae	blood	NDM	512	R	512	R	15	R
1167	female	56	Citrobacter freundii	drainage fluid		0.25	S	1	S	26	S
1168	female	0	Klebsiella oxytoca	sputum		0.064	S	0.064	S	32	S
1169	female	31	Citrobacter freundii	sputum		1	S	2	S	25	S
1170	female	57	Pseudomonas aeruginosa	sputum		2	S	1	S	29	S
1171	female	0	Klebsiella oxytoca	sputum		0.064	S	0.125	S	30	S
1172	male	65	Serratia marcescens	sputum	not detected	32	R	32	R	19	R
1173	male	55	Citrobacter freundii	bronchoalveolar lavage fluid		0.25	S	0.5	S	28	S
1174	female	72	Pseudomonas aeruginosa	pleural fluid	not detected	16	R	16	R	21	S
1175	male	93	Citrobacter freundii	sputum		0.25	S	0.25	S	31	S
1176	male	69	Serratia marcescens	sputum	KPC	1	S	1	S	26	S
1177	male	65	Proteus mirabilis	secretion		0.125	S	0.064	S	32	S
1178	male	30	Pseudomonas aeruginosa	drainage fluid		4	S	2	S	27	S
1179	male	25	Pseudomonas aeruginosa	sputum		2	S	1	S	28	S
1180	female	63	Klebsiella pneumoniae	urine	KPC	2	S	2	S	24	S
1181	female	54	Pseudomonas aeruginosa	blood		2	S	1	S	29	S
1182	male	70	Klebsiella pneumoniae	sputum	KPC	2	S	2	S	24	S
2001	male	75	Escherichia coli	urine		0.125	S	0.25	S	30	S
2002	female	53	Escherichia coli	urine		0.064	S	0.125	S	30	S
2003	male	67	Escherichia coli	bile		0.125	S	0.25	S	31	S
2004	female	52	Escherichia coli	urine		0.125	S	0.25	S	31	S
2005	female	75	Klebsiella pneumoniae	blood	NDM	512	R	512	R	20	R
2006	female	74	Citrobacter freundii	bile		0.125	S	0.25	S	29	S
2007	male	82	Klebsiella pneumoniae	bile	NDM	512	R	512	R	20	R
2008	female	75	Escherichia coli	bile	NDM	512	R	512	R	19	R
2009	female	69	Klebsiella pneumoniae	urine		0.064	S	0.125	S	33	S
2010	male	63	Klebsiella pneumoniae	puncture fluid		0.125	S	0.125	S	31	S
2011	male	87	Klebsiella pneumoniae	sputum		0.125	S	0.25	S	30	S
2012	male	19	Klebsiella pneumoniae	drainage fluid		0.25	S	0.25	S	31	S
2013	male	71	Klebsiella pneumoniae	blood		0.125	S	0.25	S	31	S
2014	female	0	Klebsiella pneumoniae	blood	NDM	512	R	512	R	18	R
2015	female	0	Escherichia coli	blood		0.125	S	0.5	S	31	S
2016	male	27	Enterobacter aerogenes	drainage fluid		0.5	S	0.25	S	27	S
2017	male	45	Enterobacter aerogenes	sputum		0.5	S	0.5	S	27	S
2018	male	34	Enterobacter cloacae	sputum		1	S	1	S	27	S
2019	male	57	Enterobacter cloacae	sputum		1	S	2	S	26	S
2020	male	14	Enterobacter cloacae	blood	IMP	512	R	512	R	18	R
2021	female	48	Enterobacter cloacae	drainage fluid	IMP	256	R	512	R	18	R
2022	female	76	Klebsiella oxytoca	drainage fluid		0.125	S	0.25	S	31	S
2023	male	40	Serratia marcescens	drainage fluid		0.5	S	1	S	29	S
2024	female	54	Serratia marcescens	sputum		1	S	2	S	24	S
2025	male	63	Citrobacter freundii	urine		0.125	S	0.25	S	30	S
2026	female	76	Pseudomonas aeruginosa	sputum	not detected	16	R	32	R	19	R
2027	male	68	Pseudomonas aeruginosa	sputum		8	S	4	S	21	S
2028	male	77	Pseudomonas aeruginosa	sputum		2	S	2	S	24	S
2029	male	30	Pseudomonas aeruginosa	sputum		1	S	1	S	29	S
2030	male	65	Pseudomonas aeruginosa	sputum		0.5	S	1	S	29	S
2031	male	53	Pseudomonas aeruginosa	secretion		4	S	4	S	25	S
2032	female	75	Pseudomonas aeruginosa	drainage fluid	IMP	512	R	512	R	6	R
2033	male	31	Pseudomonas aeruginosa	bronchoalveolar lavage fluid	not detected	32	R	16	R	20	R
2034	male	67	Escherichia coli	bile		1	S	2	S	25	S
2035	male	37	Escherichia coli	drainage fluid		0.125	S	0.25	S	28	S
2036	male	53	Escherichia coli	bile		0.25	S	0.25	S	30	S
2037	male	87	Escherichia coli	blood		0.125	S	0.25	S	32	S
2038	female	46	Escherichia coli	urine		0.5	S	1	S	29	S
2039	male	69	Escherichia coli	sputum		0.25	S	0.5	S	30	S
2040	male	37	Escherichia coli	drainage fluid		0.064	S	0.125	S	32	S
2041	male	0	Escherichia coli	sputum	NDM	512	R	512	R	18	R
2042	male	72	Escherichia coli	pus	NDM	512	R	512	R	20	R
2043	female	43	Escherichia coli	urine	NDM	512	R	512	R	20	R
2044	male	84	Klebsiella pneumoniae	drainage fluid		0.5	S	1	S	26	S
2045	female	79	Klebsiella pneumoniae	bile		0.125	S	0.25	S	30	S
2046	male	39	Klebsiella pneumoniae	sputum		0.5	S	0.5	S	28	S
2047	male	32	Klebsiella pneumoniae	sputum		0.125	S	0.25	S	30	S
2048	male	60	Klebsiella pneumoniae	sputum		0.125	S	0.25	S	31	S
2049	female	27	Klebsiella pneumoniae	sputum		0.25	S	0.5	S	31	S
2050	female	49	Klebsiella pneumoniae	pus		0.125	S	0.125	S	32	S
2051	female	43	Klebsiella pneumoniae	blood		0.125	S	0.25	S	32	S
2052	male	34	Klebsiella pneumoniae	pus	NDM	512	R	512	R	14	R
2053	male	73	Pseudomonas aeruginosa	urine		1	S	1	S	28	S
2054	male	50	Enterobacter aerogenes	drainage fluid		0.5	S	0.25	S	26	S
2055	male	74	Enterobacter aerogenes	sputum		0.5	S	0.25	S	26	S
2056	male	62	Enterobacter cloacae	sputum		1	S	2	S	28	S
2057	female	52	Enterobacter cloacae	drainage fluid		0.25	S	0.25	S	31	S
2058	male	66	Enterobacter cloacae	sputum		0.125	S	0.25	S	30	S
2059	male	79	Klebsiella oxytoca	bile		0.032	S	0.032	S	35	S
2060	female	67	Klebsiella oxytoca	sputum		0.125	S	0.25	S	32	S
2061	female	51	Serratia marcescens	sputum		0.25	S	0.5	S	30	S
2062	female	56	Serratia marcescens	drainage fluid		0.5	S	0.5	S	31	S
2063	male	64	Citrobacter freundii	drainage fluid		0.5	S	0.5	S	29	S
2064	male	66	Citrobacter freundii	bile		0.5	S	1	S	27	S
2065	male	45	Pseudomonas aeruginosa	sputum		2	S	2	S	28	S
2066	male	51	Pseudomonas aeruginosa	sputum		8	S	4	S	25	S
2067	male	0	Pseudomonas aeruginosa	sputum		4	S	2	S	30	S
2068	male	50	Pseudomonas aeruginosa	sputum		0.5	S	1	S	30	S
2069	male	28	Pseudomonas aeruginosa	drainage fluid		1	S	1	S	30	S
2070	male	31	Pseudomonas aeruginosa	sputum		1	S	2	S	29	S
2071	female	63	Pseudomonas aeruginosa	drainage fluid		1	S	1	S	30	S
2072	female	50	Pseudomonas aeruginosa	sputum		1	S	2	S	28	S
2073	male	53	Pseudomonas aeruginosa	sputum		8	S	4	S	25	S
2074	male	0	Pseudomonas aeruginosa	sputum		4	S	4	S	25	S
2075	female	72	Pseudomonas aeruginosa	sputum		8	S	4	S	23	S
2076	female	63	Escherichia coli	blood		0.125	S	0.25	S	31	S
2077	female	73	Escherichia coli	sputum		0.125	S	0.5	S	30	S
2078	male	74	Escherichia coli	bile		0.125	S	0.25	S	30	S
2079	female	62	Escherichia coli	urine		0.064	S	0.125	S	31	S
2080	female	47	Escherichia coli	urine		0.125	S	0.125	S	30	S
2081	male	62	Klebsiella pneumoniae	sputum		0.5	S	0.5	S	24	S
2082	male	65	Klebsiella pneumoniae	blood		0.25	S	0.5	S	25	S
2083	male	51	Klebsiella pneumoniae	sputum		0.125	S	0.25	S	31	S
2084	female	75	Klebsiella pneumoniae	sputum		0.5	S	1	S	25	S
2085	male	1	Klebsiella pneumoniae	sputum	NDM	512	R	512	R	17	R
2086	female	0	Klebsiella pneumoniae	sputum	NDM	512	R	512	R	8	R
2087	female	56	Enterobacter aerogenes	sputum		0.25	S	0.25	S	30	S
2088	male	0	Enterobacter cloacae	sputum		0.125	S	0.25	S	30	S
2089	male	48	Enterobacter cloacae	pus	NDM	512	R	512	R	16	R
2090	male	25	Enterobacter cloacae	secretion	NDM	512	R	512	R	16	R
2091	female	63	Klebsiella pneumoniae	sputum		0.125	S	0.25	S	32	S
2092	female	81	Serratia marcescens	sputum		0.25	S	0.5	S	30	S
2093	male	72	Citrobacter freundii	puncture fluid		0.125	S	0.25	S	32	S
2094	male	69	Citrobacter freundii	drainage fluid	IMP	512	R	512	R	18	R
2095	female	87	Pseudomonas aeruginosa	sputum		1	S	1	S	29	S
2096	male	88	Pseudomonas aeruginosa	sputum		4	S	4	S	22	S
2097	male	50	Pseudomonas aeruginosa	pus		2	S	1	S	26	S
2098	male	46	Pseudomonas aeruginosa	sputum		2	S	2	S	26	S
2099	male	42	Pseudomonas aeruginosa	sputum		1	S	2	S	26	S
2100	male	53	Pseudomonas aeruginosa	sputum		8	S	8	S	24	S
2101	male	34	Escherichia coli	sputum		0.125	S	0.25	S	32	S
2102	male	76	Escherichia coli	drainage fluid		0.125	S	0.25	S	32	S
2103	male	43	Escherichia coli	ascitic fluid		0.125	S	0.25	S	31	S
2104	female	62	Escherichia coli	blood		0.25	S	0.5	S	26	S
2105	female	29	Escherichia coli	blood		0.125	S	0.5	S	30	S
2106	male	32	Pseudomonas aeruginosa	sputum		2	S	4	S	27	S
2107	male	76	Pseudomonas aeruginosa	sputum		2	S	2	S	25	S
2108	female	14	Pseudomonas aeruginosa	pus		8	S	4	S	24	S
2109	male	46	Pseudomonas aeruginosa	secretion		1	S	0.5	S	33	S
2110	male	53	Pseudomonas aeruginosa	sputum		8	S	8	S	21	S
2111	male	11	Pseudomonas aeruginosa	pus		1	S	2	S	28	S
2112	male	57	Pseudomonas aeruginosa	blood		4	S	4	S	24	S
2113	male	25	Pseudomonas aeruginosa	pus		2	S	2	S	27	S
2114	male	75	Pseudomonas aeruginosa	sputum		2	S	4	S	27	S
2115	male	67	Pseudomonas aeruginosa	sputum		2	S	4	S	23	S
2116	female	45	Pseudomonas aeruginosa	bronchoalveolar lavage fluid		0.5	S	1	S	29	S
2117	female	69	Pseudomonas aeruginosa	bile		2	S	2	S	22	S
2118	male	82	Pseudomonas aeruginosa	secretion		2	S	4	S	28	S
2119	male	56	Enterobacter cloacae	bronchoalveolar lavage fluid	not detected	512	R	512	R	18	R
2120	male	49	Pseudomonas aeruginosa	sputum		4	S	8	S	24	S
